# Supplementary material
Source: Springer Nature journal article supplement (https://www.springermedizin.de/resource/supplementary/12955_2012_1125_MOESM1_ESM.pdf/9559334)

**before RRS implementation (period 1)**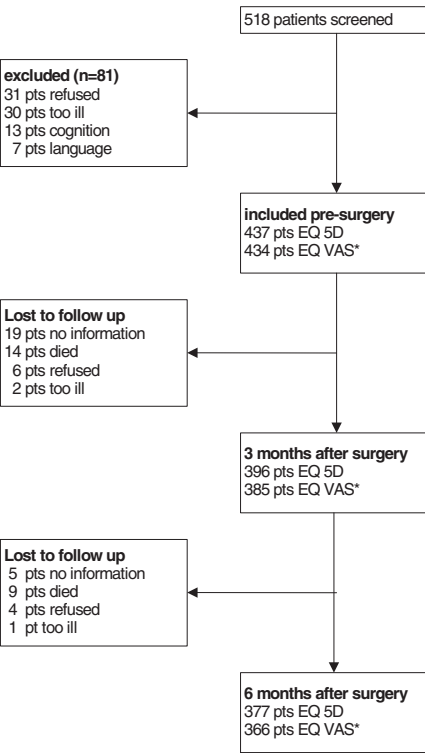**after RRS implementation (period 2)**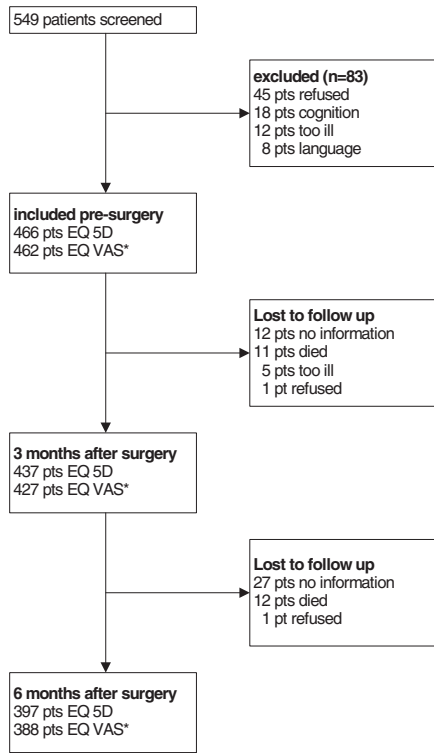

Supplement: MOESM1 [file 9559334]
